1  
2  
3  
4  
5  
6  
7  
8  
9  
10  
11  
12  
13  
14  
15  
16  
17  
18  
19  
20  
21  
22  
23

Title: Conditioned place preference reveals tonic pain in Octopus

Short title: Pain in Octopus

One sentence summary: A cognitive test demonstrating the emotional component of pain in mammals reveals the first example of pain in any invertebrate.

Author: Robyn J Crook  
Department of Biology  
San Francisco State University  
1600 Holloway Avenue, San Francisco CA 94132 USA  
[rcrook@sfsu.edu](mailto:rcrook@sfsu.edu)  
ORCID: 0000-0002-4079-7996

24 Abstract

25

26 Tonic pain is an ongoing, negative affective state arising from tissue damage or inflammation (1).  
27 Because pain is aversive and its relief is innately rewarding, mammals learn to avoid a context in which  
28 pain is experienced, and prefer one where pain relief occurs(2, 3). It is generally accepted that vertebrate  
29 animals experience pain(4), however, there is currently no compelling evidence that pain occurs in any  
30 invertebrate(5). Here we show that octopuses exhibit tonic pain behavior after subcutaneous injection of  
31 dilute acetic acid. In conditioned place preference assays, octopuses avoid contexts in which pain was  
32 experienced, prefer a location in which they experienced tonic pain relief, and show no conditioned  
33 preference in pain's absence. Octopuses are thus the first invertebrate shown to experience pain.

34

35 Main

36

37 Whether invertebrate animals are capable of experiencing pain is the subject of ongoing debate(6–9).  
38 Unlike nociception, which is a simple reflex response, pain is a complex emotional state encompassing  
39 distress and suffering, and is generally considered to require a highly complex nervous system(10).  
40 Discrete pain circuits within the central brain produce two distinct aspects of pain experience; the  
41 “discriminative” component, encompassing the location, quality and intensity of pain, and the “affective”  
42 component, encompassing the negative emotional state (11). Pain is accepted to occur in vertebrate  
43 animals, although pain experience that is persistent and ongoing (tonic pain) has to date only been  
44 demonstrated in mammals(1, 12). Although the evolutionary origins of pain remain unresolved, there is no  
45 conclusive evidence indicating the capacity to experience pain has evolved independently in any  
46 invertebrate, whose brains are typically smaller and simpler than those of vertebrates(13–15).

47

48 Cephalopod molluscs are extreme outliers in the realm of invertebrate brains; unlike all other  
49 invertebrates, their brain size, cognitive ability and behavioral flexibility surpass those of many  
50 vertebrates(16). Their nervous system is organized fundamentally differently from those of vertebrates,  
51 with extensive peripheral control of sensing and movement which seems to occur largely independently of  
52 the central brain(17). Their large brains and complex behaviors have led to concern for their welfare, and  
53 efforts to regulate invasive procedures performed on cephalopods in research laboratories are now  
54 established in many nations (18). These rules are informed by the untested assumption that cephalopods’  
55 ‘intelligence’ implies they can experience pain, even where no conclusive evidence exists.

56

57 Here, a well-established assay for demonstrating the affective component of tonic pain in mammals (2,  
58 19) was applied to Octopus. After a single training session in a three-chamber conditioned place  
59 preference (CPP) box (Figure 1), octopuses that received subcutaneous injection of dilute (0.5%) acetic  
60 acid into one arm (n=8) showed clear avoidance of their initially-preferred chamber, in which they were

61 confined after injection (Fig. 2A, one-sample t-test,  $p=0.003$ ). Saline-injected animals ( $n=7$ ) showed no  
62 change in their chamber preference before and after training trials ( $p=0.19$ ). The change in time spent in  
63 the initially preferred chamber differed between the two groups (Bonferroni post-hoc test,  $p=0.006$ , Figure  
64 2).

65  
66 Relief from tonic pain is rewarding, and thus a drug that provides pain relief provides a strong training  
67 signal in the presence of tonic pain, but no signal in its absence. Conditioned place preference for a  
68 location associated with an analgesic is considered strong evidence for tonic pain in vertebrate animals  
69 (2, 20). Here, octopuses with AA-induced tonic pain received topical injection of lidocaine (21)  
70 immediately prior to being confined to the chamber they least preferred in initial preference tests.  
71 Lidocaine injection induced strong preference for that chamber in test trials for AA injected animals (Fig  
72 2A, one-sample t-test,  $p=0.005$ ), but there was no preference for the lidocaine-paired chamber in animals  
73 that received saline injection instead of AA ( $p=0.51$ ), and chamber preference also differed between the  
74 two groups (Bonferroni post-hoc test,  $p=0.003$ ). This demonstrates that lidocaine injection was rewarding  
75 to animals only if they were experiencing ongoing pain, and that lidocaine alone is not innately rewarding  
76 for octopuses.

77  
78 While CPP is useful for testing the affective component of pain, it does not necessarily reveal the  
79 discriminatory aspect, which includes awareness of the location, quality and intensity of pain (10, 11).  
80 Point observations of potential pain-associated behaviors (grooming, guarding and concealment) were  
81 made at 5-minute intervals during conditioning trials (Session 2), and again 24 h after conditioning trials.  
82 All octopuses injected with AA groomed the injection site with the beak for the full 20-minute training trial  
83 (Fig 3A), but this behavior was either brief or completely absent in the other groups (Fig. 3B). While  
84 wound-directed behavior has been reported previously in octopuses (22) and other invertebrates (23), the  
85 behaviors observed here appear to be specific to acid injection. In all animals receiving AA injection beak  
86 grooming resulted in the removal of a small area of skin over the injection site, which was apparent at the  
87 conclusion of the 20-minute conditioning trial that followed the injection. This behavior was never  
88 observed in animals receiving saline injection or after injection of lidocaine. In other studies of nociception  
89 in octopus, arm compression, skin pinch and skin incision induced prolonged beak grooming but never  
90 skin stripping (22), suggesting that AA injection produced a central representation of pain that was quite  
91 different to other injury modalities. Noxious stings, which AA injection likely approximated, are likely  
92 encountered by octopuses as they hunt venomous prey (24, 25); it is plausible that skin stripping is an  
93 injury-induced behavior that has evolved to release injected venom from the skin. This distinct behavior  
94 suggests that the octopus central brain is capable of encoding not only the location but also the specifics  
95 of pain quality.

96

97 Cephalopods are highly unusual in the degree to which higher-order sensory information processing  
98 occurs in the peripheral nervous system (17, 26). Tonic pain in mammals is driven by sustained activity in  
99 primary nociceptors that then drives long-term changes within higher-order, central circuits (27, 28).  
100 Spontaneous nociceptor firing after tissue injury has also been shown in cephalopods, to date the only  
101 invertebrate taxon where this mammalian-like pattern has been recorded (29). Whether spontaneous  
102 activity in nociceptors drives ongoing excitation of central circuits in the cephalopod brain has not been  
103 clear, raising questions of how much the central brain 'knows' about noxious sensations in peripheral  
104 tissues.

105  
106 To assess what information the central brain receives about nociceptive stimuli in the arms,  
107 electrophysiological recordings were taken from the brachial connectives, which connect the arm nerve  
108 cords to the brain and are central to the major arm ganglia situated in the inter-brachial commissure. In a  
109 reduced preparation, injection of a bolus of acetic acid subcutaneously into one arm resulted in a  
110 prolonged period (>30 minutes) of ongoing activity in numerous recorded units, which was silenced  
111 rapidly by injection of 2% lidocaine overlying the site of AA injection (Fig 4). This activity generated within  
112 the area of AA infiltration could provide information to the brain about the location of the painful stimulus.  
113 Lidocaine injection into the infiltration site also reversed the sensitization of afferent activity evoked by  
114 strong mechanical stimulation at and proximal to the injection site, suggesting a role of ongoing afferent  
115 activity in promoting evoked pain (hyperalgesia) as well as tonic pain.

116  
117 Together, these data reveal the existence of a tonic pain state in octopuses; the first clear example of  
118 pain in any invertebrate species and the first example of tonic pain in any non-mammal (30). Although a  
119 number of previous studies in cephalopods and other invertebrates have shown avoidance learning of a  
120 context in which a noxious stimulus was delivered (31–34), such experiments do not demonstrate the  
121 affective component of pain, which relies on higher cognitive and emotional processing. Here, octopuses  
122 were able to learn to avoid a visually-specific location that was explicitly unlinked both in time and space  
123 from the injection procedure that initiated nociceptor activation, thus the most plausible explanation for the  
124 strong place avoidance behavior observed here is that octopuses experiences a state of ongoing (tonic)  
125 pain and negative affect after acetic acid injection, which was relieved by local injection of lidocaine into  
126 the arm. A common criticism of drug-reversed place aversion is that the chosen analgesic drug is innately  
127 rewarding, and its hedonic quality is sufficient to create place preference even in animals in neutral  
128 affective states (19, 35). The use of lidocaine in this experiment precludes this alternative explanation;  
129 lidocaine had no central effect when injected locally, and produced no place preference in octopuses who  
130 had not previously received AA injection (and thus were not in pain).

131  
132 In evolutionary terms, tonic pain is often hypothesized to be adaptive primarily among social species  
133 where injured individuals can recruit help from in-group members while ongoing pain reinforces resting

134 and recuperative behaviors (7). Additionally, the strong negative affect produced by injury is cited as an  
135 adaptive mechanism for reinforcing contextual memory of danger that lasts throughout life. Although the  
136 octopus is often described as being “vertebrate-like” in cognitive ability and intelligence, its asocial habits,  
137 short lifespan and severe nutritional costs of recuperative inactivity (36) argue against the prevailing  
138 evolutionary hypotheses cited for pain’s evolution in vertebrates. Instead, the evolution of exceptional  
139 neural complexity in cephalopods is typically attributed to their ecological association with complex  
140 habitats, niche competition with fish, and their reliance on complex camouflage and signaling behaviors  
141 (37, 38). How and why pain experience has evolved in cephalopods remains to be understood, and  
142 further investigations of the molecular, genetic and anatomical bases of pain in invertebrates will be  
143 necessary to shed light on the extraordinary parallel evolution of pain experience in this unique  
144 invertebrate clade.

145 References

- 146 1. T. King, L. Vera-Portocarrero, T. Gutierrez, T. W. Vanderah, G. Dussor, J. Lai, H. L. Fields, F.  
147 Porreca, Unmasking the tonic-aversive state in neuropathic pain. *Nat. Neurosci.* **12**, 1364–1366  
148 (2009).
- 149 2. E. Navratilova, J. Y. Xie, T. King, F. Porreca, Evaluation of reward from pain relief. *Ann. N. Y.*  
150 *Acad. Sci.* **1282**, 1–11 (2013).
- 151 3. S. Millot, M. Cerqueira, M. F. Castanheira, Ø. Øverli, C. I. M. Martins, R. F. Oliveira, Use of  
152 conditioned place preference/avoidance tests to assess affective states in fish. *Appl. Anim. Behav.*  
153 *Sci.* **154**, 104–111 (2014).
- 154 4. L. U. Sneddon, Evolution of nociception and pain: evidence from fish models. *Philos. Trans. R.*  
155 *Soc. B Biol. Sci.* **374**, 20190290 (2019).
- 156 5. E. T. Walters, Pain-capable neural substrates may be widely available in the animal kingdom.  
157 *Animal Sentience.* **63**, 1–5 (2016).
- 158 6. R. W. Elwood, in *The Welfare of Invertebrate Animals*, C. Carere, J. Mather, Eds. (Springer,  
159 Cham, 2019), pp. 147–177.
- 160 7. E. T. Walters, A. C. de C. Williams, A. C. De C Williams, Evolution of mechanisms and behaviour  
161 important for pain. *Philos. Trans. R. Soc. B Biol. Sci.* **374**, 20190275 (2019).
- 162 8. J. Groening, D. Venini, M. V. Srinivasan, In search of evidence for the experience of pain in  
163 honeybees: A self-Administration study. *Sci. Rep.* **7** (2017), doi:10.1038/srep45825.
- 164 9. B. J. King, L. Marino, Octopus minds must lead to octopus ethics. *Anim. Sentience.* **263**, 1–4  
165 (2019).
- 166 10. R. D. Treede, D. R. Kenshalo, R. H. Gracely, A. K. P. Jones, The cortical representation of pain.  
167 *Pain.* **79**, 105–111 (1999).
- 168 11. M. Auvray, E. Myin, C. Spence, The sensory-discriminative and affective-motivational aspects of  
169 pain. *Neurosci. Biobehav. Rev.* **34** (2010), pp. 214–223.
- 170 12. J. S. Mogil, The translatability of pain across species. *Philos. Trans. R. Soc. B Biol. Sci.* **374**,  
171 20190286 (2019).
- 172 13. M. Kavaliers, Evolutionary and comparative aspects of nociception. *Brain Res. Bull.* **21**, 923–931  
173 (1988).
- 174 14. B. Key, D. Brown, Designing brains for pain: Human to mollusc. *Front. Physiol.* **9** (2018),  
175 doi:10.3389/fphys.2018.01027.
- 176 15. R. W. Elwood, Discrimination between nociceptive reflexes and more complex responses  
177 consistent with pain in crustaceans. *Philos. Trans. R. Soc. B Biol. Sci.* **374**, 20190368 (2019).
- 178 16. B. Hochner, T. Shomrat, G. Fiorito, The octopus: a model for a comparative analysis of the  
179 evolution of learning and memory mechanisms. *Biol. Bull.* **210**, 308–317 (2006).
- 180 17. Y. Gutfreund, H. Matzner, T. Flash, B. Hochner, Patterns of motor activity in the isolated nerve  
181 cord of the octopus arm. *Biol. Bull.* **211**, 212–22 (2006).

- 182 18. G. Ponte, P. Andrews, V. Galligioni, J. Pereira, G. Fiorito, (Springer, Cham, 2019), pp. 209–228.
- 183 19. K. J. Sufka, Conditioned place preference paradigm: a novel approach for analgesic drug  
184 assessment against chronic pain. *Pain*. **58**, 355–366 (1994).
- 185 20. J. V. Roughan, C. A. Coulter, P. A. Flecknell, H. D. Thomas, K. J. Sufka, The conditioned place  
186 preference test for assessing welfare consequences and potential refinements in a mouse bladder  
187 cancer model. *PLoS One*. **9** (2014), doi:10.1371/journal.pone.0103362.
- 188 21. H. M. Butler-Struben, S. M. Brophy, N. A. Johnson, R. J. Crook, In vivo recording of neural and  
189 behavioral correlates of anesthesia induction, reversal, and euthanasia in cephalopod molluscs.  
190 *Front. Physiol.* **9** (2018), doi:10.3389/fphys.2018.00109.
- 191 22. J. S. Alupay, S. P. Hadjisolomou, R. J. Crook, Arm injury produces long-term behavioral and  
192 neural hypersensitivity in octopus. *Neurosci. Lett.* **558**, 137–142 (2014).
- 193 23. R. W. Elwood, Pain and suffering in invertebrates? *ILAR J.* **52** (2011).
- 194 24. W. R. Brooks, The influence of the location and abundance of the sea anemone *Calliactis tricolor*  
195 (Le Sueur) in protecting hermit crabs from octopus predators. *J. Exp. Mar. Bio. Ecol.* **116**, 15–21  
196 (1988).
- 197 25. D. M. Ross, Protection of hermit crabs (*Dardanus* spp.) from octopus by commensal sea  
198 anemones (*Calliactis* spp.). *Nature*. **230**, 401–402 (1971).
- 199 26. G. Sumbre, Y. Gutfreund, G. Fiorito, T. Flash, B. Hochner, Control of Octopus arm extension by a  
200 peripheral motor program. *Science (80- )*. **5536**, 1845–1848 (2001).
- 201 27. L. Davoody, R. L. Quiton, J. M. Lucas, Y. Ji, A. Keller, R. Masri, Conditioned place preference  
202 reveals tonic pain in an animal model of central pain. *J. Pain*. **12**, 868–874 (2011).
- 203 28. T. King, C. Qu, A. Okun, R. Mercado, J. Ren, T. Brion, J. Lai, F. Porreca, Contribution of afferent  
204 pathways to nerve injury-induced spontaneous pain and evoked hypersensitivity. *Pain*. **152**, 1997–  
205 2005 (2011).
- 206 29. R. J. Crook, R. T. Hanlon, E. T. Walters, Squid have nociceptors that display widespread long-  
207 term sensitization and spontaneous activity after bodily injury. *J. Neurosci.* **33**, 10021–10026  
208 (2013).
- 209 30. E. Walters, Defining pain and painful sentience in animals. *Anim. Sentience*. **3** (2018).
- 210 31. B. Budelmann, J. Young, Brain Pathways of the Brachial Nerves of *Sepia* and *Loligo*. *Philos.*  
211 *Trans. R. Soc. Lond. B. Biol. Sci.* **315**, 345–352 (1987).
- 212 32. G. D. Sanders, Long-term memory of a tactile discrimination in *Octopus vulgaris* and the effect  
213 of vertical lobe removal. *Brain Res.* **20**, 59–73 (1970).
- 214 33. B. Magee, R. W. Elwood, Shock avoidance by discrimination learning in the shore crab (*Carcinus*  
215 *maenas*) is consistent with a key criterion for pain. *J. Exp. Biol.* **216**, 353–8 (2013).
- 216 34. R. W. Elwood, M. Appel, Pain experience in hermit crabs? *Anim. Behav.* **77**, 1243–1246 (2009).
- 217 35. T. M. Tzschentke, Measuring reward with the conditioned place preference (CPP) paradigm:  
218 Update of the last decade. *Addict. Biol.* **12** (2007), pp. 227–462.

- 219 36. M. J. Wells, A. Clarke, Energetics : The costs of living and reproducing for an individual  
220 cephalopod. *Philos. Trans. R. Soc. B Biol. Sci.* **351**, 1083–1104 (1996).
- 221 37. R. K. O'Dor, D. M. Webber, The constraints on cephalopods: why squid aren't fish. *Can. J. Zool.*  
222 **64**, 1591–1605 (1986).
- 223 38. R. Hanlon, J. Messenger, *Cephalopod behaviour* (2018).  
224



225 Figures:

226

227

228

229

230

231

232

233

234

235

236

237

238

239

240

241

242

243

244

245

246

247

248

249

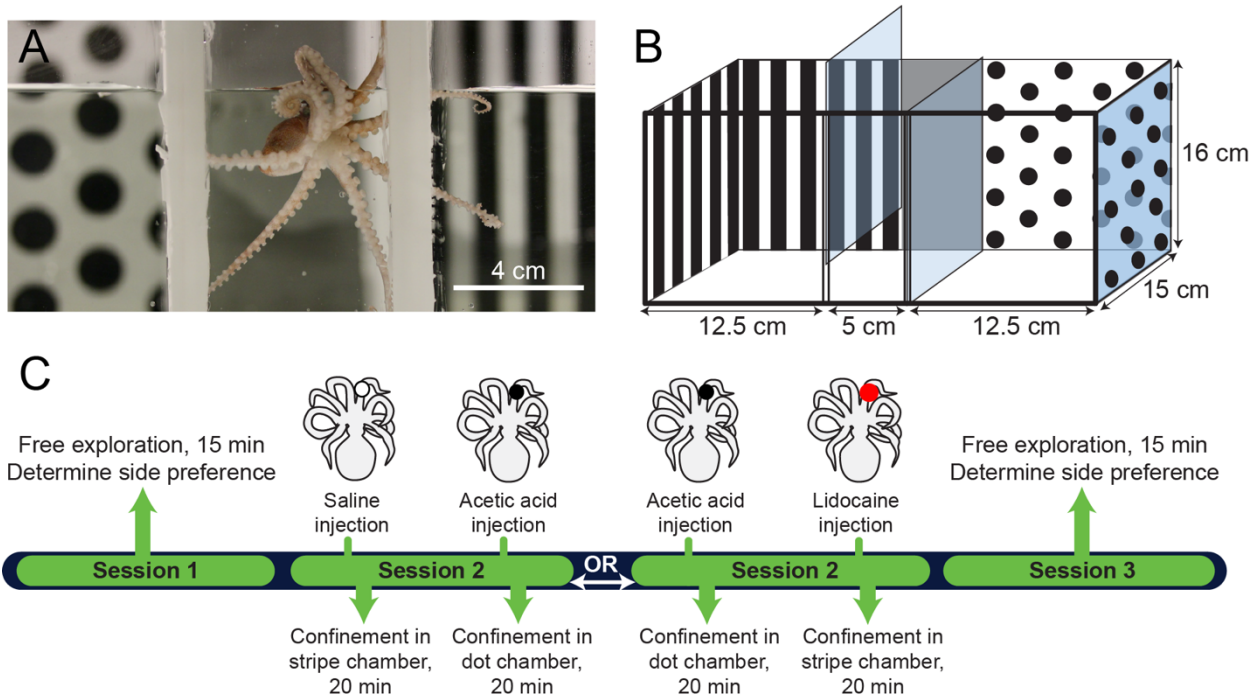

243 Figure 1. CPP design and timeline. A. *Octopus bocki* in the start chamber of the CPP box. B. Diagram of  
244 the apparatus, with pattern shown on the back and sides only for clarity. In experimental trials, visual cues  
245 covered all four walls. C. Timeline of an experiment showing sequences for CPA and CPP procedures. In  
246 this example, an octopus showed an initial preference in Session 1 for the dot chamber, and is thus  
247 trained against initial preference (i.e., the octopus is given AA injection prior to confinement in the dot  
248 chamber or lidocaine prior to the stripe chamber). Control sequences (Saline/Saline and  
249 Saline/Lidocaine) not shown.

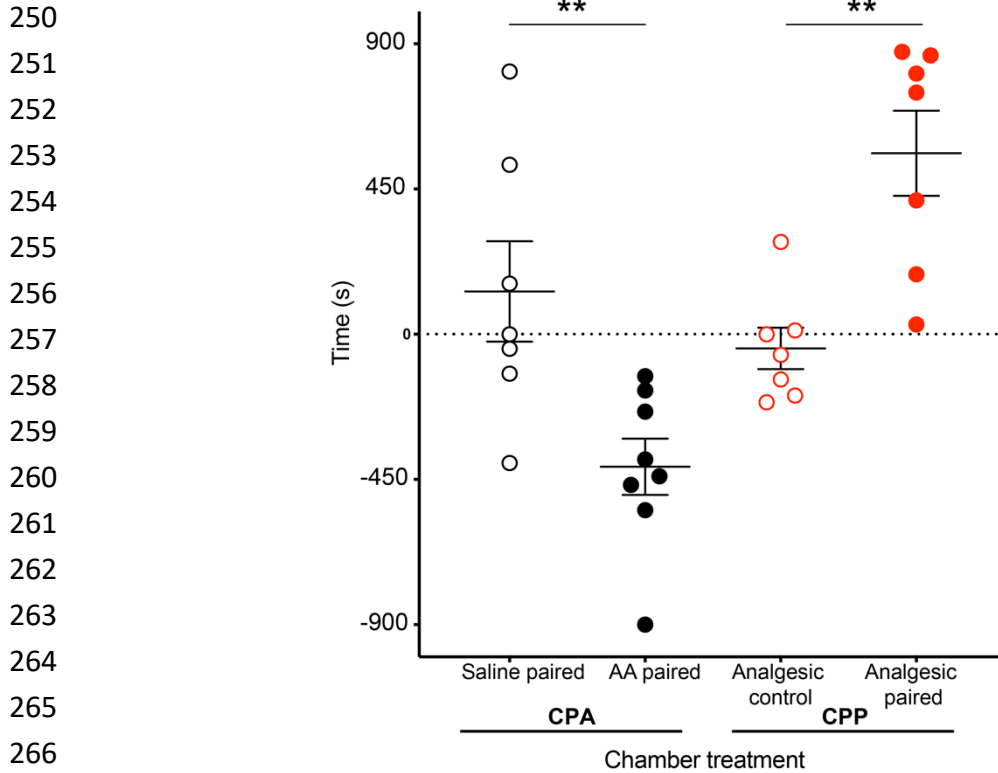

268 Figure 2. Conditioned Place Avoidance (CPA) and Conditioned Place Preference (CPP) assays reveal  
269 the affective component of pain in octopus. In trials where initially preferred chambers were paired with  
270 0.5% acetic acid (AA) injection, octopuses spent less time in their initially preferred chamber in a post-  
271 training period of free exploration, compared with octopuses receiving saline. In trials where octopuses  
272 received lidocaine over an area of prior injection (either saline or AA), octopuses preferred the chamber  
273 paired with lidocaine only if they had previously been given AA injection.

274  
275  
276  
277  
278  
279  
280  
281  
282  
283  
284  
285  
286  
287  
288  
289  
290

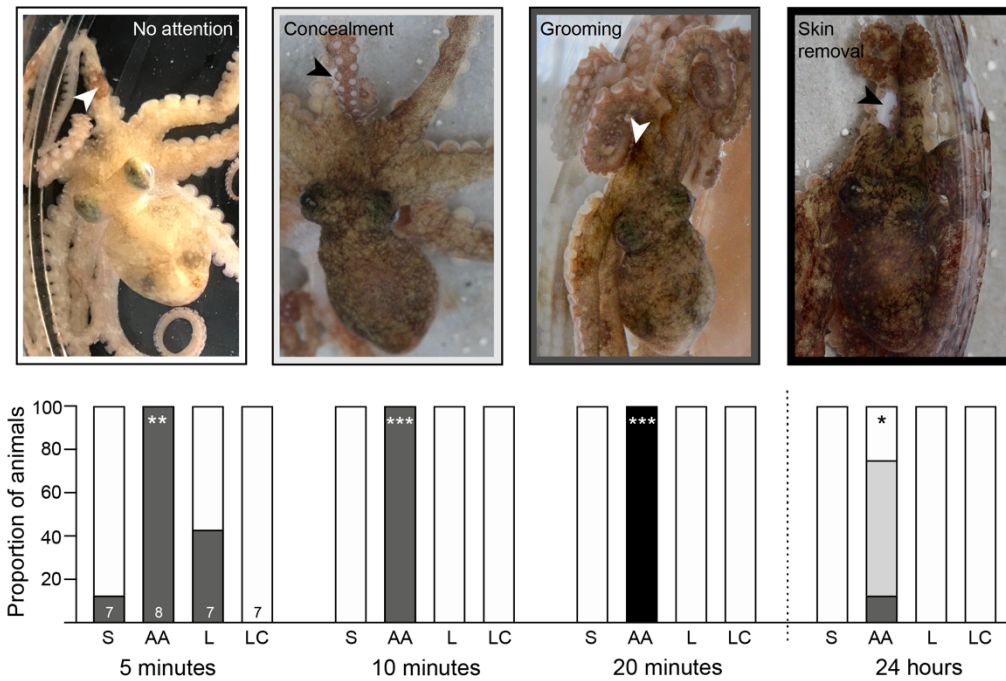

291 Figure 3. Precise and specific wound-directed grooming behaviors show discriminative pain experience in  
292 Octopus. Top panel shows examples of wound-directed behaviors, and colors surrounding each image  
293 correspond to shaded frequencies in stacked bars, below. Arrowheads indicate the location of AA  
294 injection on the arm. Behaviors were observed during training trials and 24h later. AA-injected octopuses  
295 showed sustained wound attention and concealment that persisted for at least 24 hours after AA injection.  
296 Skin removal behavior was observed in all AA-injected animals, suggesting a specific representation of  
297 acid-induced pain that elicits a highly specific behavioral response. Bar acronyms: AA: acetic acid  
298 injection; S: Saline injection; L: Lidocaine injection after earlier AA injection; LC; Lidocaine control  
299 (lidocaine injected after earlier saline injection)

300  
301  
302  
303  
304  
305  
306  
307  
308  
309  
310  
311  
312  
313  
314  
315  
316  
317  
318  
319  
320  
321  
322

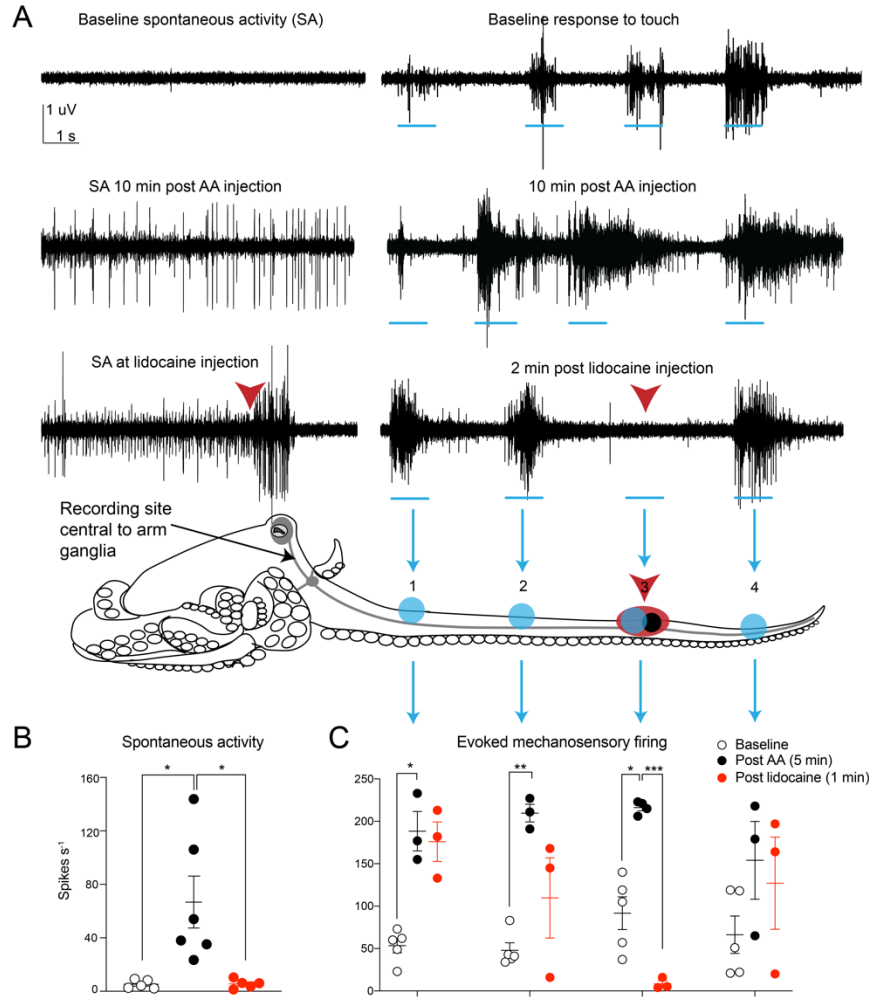

323  
324  
325  
326  
327  
328  
329  
330  
331  
332  
333

Figure 4. Examples of electrophysiology recordings and summary data showing that nociceptive signal from the arms is available to the Octopus CNS. A. Examples of spontaneous (ongoing) and evoked activity in the brachial connective before and after injection of acetic acid (AA, shown as a black circle at arm stimulation position 3), and at the point where lidocaine is injected locally over the region of prior AA injection (shown as a red overlay of the black circle on the arm at position 3). Note the almost immediate cessation of ongoing activity after lidocaine injection, and the complete suppression of evoked activity in the region where lidocaine was injected at position 3 on the arm of the octopus. B. Ongoing, spontaneous firing in the brachial connective is increased after AA injection and blocked by injection of lidocaine into the same position on the arm. C. Summary data showing responses to touch on the arm at four locations (indicated by shaded blue circles on the octopus body outline). There is clear enhancement of evoked activity after injection that is suppressed by injection of a local anesthetic.

334 Supplementary Materials: “Conditioned Place Preference reveals tonic pain in Octopus”

335

336 Materials and Methods:

337

338 Animals: Adult *Octopus bocki* (Bock’s pygmy octopus, N=29, sex undetermined, average mantle length  
339 14 mm) were obtained from a commercial vendor (Sea Dwelling Creatures, Los Angeles, CA, USA), and  
340 housed individually in rectangular tubs (23cm L x 15w x 15.8h, capacity 1900 mL), providing physical,  
341 visual and chemical isolation from neighbors. Individual inflow pipes circulated artificial seawater (Instant  
342 Ocean, S.G. 1.023, pH 8.1-8.2, 24 Deg C) through each enclosure at a rate of 500 mL/min. Full turnover  
343 of water volume occurred every four minutes. Enclosures were located within larger recirculating  
344 seawater systems, where water was filtered constantly through physical, biological and charcoal filters.  
345 Water quality was monitored daily; ammonia and nitrite were 0 ppm and nitrates ranged up to 20 ppm.  
346 Each octopus enclosure contained a bed of crushed coral chips 2 cm deep, three PVC elbow joints of  
347 either ½ or ¾ inch, two plastic plants, at least six empty snail and clam shells and two pieces of coral  
348 rubble.

349 Octopuses were fed once per day on a 5mm cube of thawed, frozen, uncooked shrimp (Trader Joe’s  
350 brand). Uneaten food was siphoned from the tank once per day during routine tank maintenance. During  
351 daily husbandry, octopuses were pre-trained to move from their home tank into a glass beaker to allow  
352 tank siphoning, a behavior which also facilitated movement into the conditioning chamber during  
353 experiments. Animals were maintained in the laboratory for at least one week prior to being used in  
354 experiments, and only animals that were readily accepting food, sheltering normally and were habituated  
355 to daily husbandry were used in behavioral experiments.

356 At the conclusion of behavioral studies, animals that had received painful stimuli were euthanized 24  
357 hours after conclusion of training. The delay was to ensure that the drugs did not induce toxicity or cause  
358 death in the acute post-injection period. Octopuses were killed according to established methods (1), and  
359 tissue was fixed for later use. Control animals were maintained for up to two weeks prior to being used in  
360 electrophysiology experiments. Two females in the control group laid eggs within the two weeks and were  
361 left to brood their eggs until they died of natural senescence-induced decline.

362

363 Ethical note: In the United States octopuses are not included in vertebrate animal regulations that govern  
364 the use of animals in research. Although no formal approval process occurred, all animal procedures  
365 were conducted in accordance with EU Directive 63/2010/EU (2), which contains the most stringent  
366 requirements for cephalopod research globally. Because the study necessarily involved the use of painful  
367 stimuli, sample sizes were calculated to capture moderate and large effect sizes only at a power of 0.8.  
368 Post-hoc power analysis indicated 86% power in the CPA experiment and 98% power in the CPP  
369 experiment. Procedures, record keeping and reporting were conducted using ARRIVE guidelines (3).

370

371 Conditioned place preference (CPP) experiments

372 Apparatus: The CPP arena was made from a modified 9.5 L glass aquarium (Carolina Biological, Item  
373 671226). Two flexible, PVC channels were glued to the sides and bottom of the tank to create holders for  
374 two removeable, clear, plexiglass dividers, which when inserted created a three-chamber box (see Fig.  
375 1A&B) with a narrow central start box and two equal-sized end chambers. Visual cues on the tank walls  
376 were either black spots (diameter 12 mm, spaced edge-to-edge 6 mm apart) on a white background, or  
377 equally spaced black and white, vertical bars (8 mm wide). Walls in the central start box were uniform,  
378 50% grey, and the floor in all three chambers was white. Chamber dividers were clear, but were covered  
379 with same-chamber patterns during conditioning confinements in each chamber. The arena was filled with  
380 3L of home tank water, which was not circulated or aerated during trials. Between trials, the water was  
381 discarded and tanks were washed inside and out with hot, soapy water to remove any olfactory cues,  
382 then rinsed three times with Milli-Q filtered water, sprayed with 70% ethanol solution, and left to dry in  
383 bright sunlight. Trials were conducted in an isolated, black-walled room with limited external visual cues.  
384 Supplemental, controlled light was provided by a fiber-optic light reflecting diffuse light from the ceiling,  
385 which was white. Light level at the water surface was measured with a digital light meter (Dr. Meter  
386 LX1010B) at 11 lux. Trials were recorded by a camcorder (Sony FDR-AX33) fitted with a polarized light  
387 filter and positioned directly overhead.

388 Drugs. Glacial acetic acid (Sigma-Aldrich, A6283) was diluted in filtered, artificial seawater to produce a  
389 final concentration of 0.5% v/v. Sham injections were fASW only. Lidocaine solution (2% HCl) was  
390 obtained from A-to-Z Vet Supply (item 515-510212).

391

392 Procedure: On Day 1, (Session 1, or “Initial Preference Test”) animals were moved from their home tanks  
393 and placed into the central start box of the CPP arena. After a two-minute acclimation period, the clear  
394 dividers were lifted and octopuses explored freely for 15 minutes. At the conclusion of exploration,  
395 octopuses were removed from the CPP chamber in small transfer beakers and returned to their home  
396 tanks. Routes taken by each subject were analyzed by Ethovision animal tracking software (Noldus), and  
397 end-chamber in which each animal spent the most time (i.e., its initial preference) was recorded. In three  
398 cases the octopus did not leave the start box in the first trial. These animals were assigned an initial  
399 preference randomly.

400 The following day, Session 2 (“Training”) comprised two conditioning trials, with the animal confined first  
401 in one chamber and then the other. Training was against initial preference, meaning that painful stimuli  
402 were experienced in the chamber the animal preferred initially, and neutral or pain-relieving treatments  
403 were given prior to confinement in the initially non-preferred chamber.

404 Prior to the first conditioning trial, animals were removed from their home tank and lightly sedated in 1%  
405 EtOH in ASW for handling. Once animals were unresponsive to touch (5-10 minutes after EtOH  
406 introduction), one arm was selected for drug treatment. In Experiment 1 (CPA associated with AA  
407 injection), 1-2 $\mu$ L of saline was injected about 1/3 along the length of the arm under the dorsal skin, using

408 a 10uL Hamilton syringe and a 30g needle, fitted with a 0.2 micron filter. In Experiment 2, (CPP  
409 associated with lidocaine injection), half of the animals received 0.5% AA solution, and half received  
410 saline.  
411 Immediately after injection the sedation bath was replaced by running fASW. Animals typically recovered  
412 normal behavior within 5-10 minutes. Fifteen minutes after recovery from sedation, octopuses were  
413 confined in their initially non-preferred chamber for Experiment 1, and their initially preferred chamber for  
414 Experiment 2, for 20 minutes.  
415 At the conclusion of the first 20-minute training trial animals were removed using the standard transfer  
416 procedure and allowed to rest undisturbed in small holding tanks for 30 minutes while tanks were  
417 washed, dried and refilled with fresh home tank water. After 30 minutes, octopuses were re-sedated for  
418 the second injection procedure. In Experiment 1, half of the subjects received 0.5% acetic acid (“AA”) into  
419 the arm adjacent to that used for the first injection, while the other half received a second saline injection.  
420 In Experiment 2, all the animals received 3uL of 2% lidocaine hydrochloride at the same site as the first  
421 injection. Recovery from sedation followed the same procedure as above, and then animals were  
422 confined in their initially-preferred chamber for Experiment 1, and their initially non-preferred chamber for  
423 Experiment 2, for 20 minutes.  
424 During training, the clear plexiglass divider was replaced with an opaque panel showing the same pattern  
425 as the other three chamber walls, thus the pattern in the opposite chamber was completely out of sight  
426 during each training. After the second training trial, animals were returned to home tanks. Animal  
427 movements were not tracked during single-chamber confinements in the training sessions.  
428 Test trials (Session 3, or “Final Preference Test”) occurred between 5 and 6 hours after the conclusion of  
429 the second training trial, on the same day. The procedure was identical to the initial preference test on the  
430 preceding day. No drugs or sedation were administered prior to the final training trial.

431

#### 432 Electrophysiology

433 To ascertain what information the central brain receives about noxious events in the arms, activity was  
434 recorded from the brachial connectives, which run between the CNS and the first major ganglion at the  
435 top of the arm nerve cord (see Fig. 4). The major arm ganglion lies within the inter-arm commissure,  
436 which is a ring linking all the arm that sends signals from one arm to the other. Because there is extensive  
437 peripheral processing and sensorimotor integration at the level of the individual brachial ganglia along the  
438 arm, and again at the level of the major arm ganglia in the inter-arm commissure, afferent signals  
439 recorded from the brachial connectives represent highly pre-processed input into the central brain (4).  
440 Previous studies have shown that relatively little non-nociceptive mechanosensory information is  
441 transmitted centrally from distal arm regions (5–7), raising the possibility that noxious sensory information  
442 is processed entirely in the periphery, without involvement of the central brain.

443

444 Octopuses were killed by immersion in isotonic magnesium chloride solution (330mM in Milli-Q filtered  
445 water). Ten minutes after respiration stopped, the arm crown was cut from the head and mantle with a  
446 scalpel and the brachial connectives exposed by microdissection of overlying tissues. The preparation  
447 was pinned tightly into a Sylgard-coated petri dish and the MgCl<sub>2</sub> solution was washed off with fASW.  
448 One brachial connective was drawn into a suction electrode and the preparation was allowed to rest for  
449 15 minutes. Background firing was recorded for one minute, then a stiff (potentially noxious) von Frey  
450 filament (number 5.07, applying 10 g of tip force) was applied to four positions on the arm, moving  
451 distally. The stimulation sequence was repeated three times, then the same volume of 0.5% AA used in  
452 behavioral experiments was injected into the arm. Background firing and response to the mechanical  
453 stimuli were recorded at 1, 5, 10, 30 and 120 minutes in two preparations (data not shown). In six other  
454 preparations, 2% lidocaine HCl was injected into the arm at 20 minutes, and background firing and  
455 evoked responses recorded 2 minutes thereafter.

456 Signals were amplified by an A-M Systems differential extracellular amplifier (model 1700), then digitized  
457 and recorded at 10kHz with a PowerLab 4/35 running LabChart Pro software.

458

459 Data analysis and statistics

460 CPP: Octopus movements were tracked from recorded video files using Ethovision 13 (Noldus).

461 Examples of tracks and associated data are shown in Fig S1. Time spent per chamber in Session 3 was  
462 subtracted from pre-conditioning times spent in Session 1, and all data are expressed as changes from  
463 baseline chamber preferences recorded in Session 1. All statistical procedures were conducted in Prism  
464 8.0 (GraphPad). Data distribution was tested with the Kolmogorov Smirnov test and met the assumptions  
465 of normality. A single-factor ANOVA followed by planned, post-hoc Bonferroni tests was used to identify  
466 between-group differences. To assess whether individual groups' change in time-per-chamber differed  
467 from zero, (a zero value would indicate no change in preference) a one-sample t-test was conducted with  
468 an expected value of zero.

469 Point observations of pain-related behavior were taken every 5 minutes from recorded video footage of  
470 training trials. At each point, beak grooming and concealment of the treated area were noted, and  
471 frequency per treatment group (proportion of total animals) was compared using Fisher's exact tests. At  
472 the conclusion of training trials, arms were inspected for evidence of skin stripping behavior.

473 Electrophysiology: Spikes above noise threshold were counted using the automated "Spike Histogram"  
474 module in LabChart Pro. For each touch, spikes were counted for a 1s period of maximal firing.

475 Mechanical stimuli were repeated at the same location and timepoint, averaged, and compared at  
476 baseline, after AA injection and after lidocaine injection with a repeated-measures ANOVA followed by  
477 post-hoc, paired t-tests corrected using the Holm-Bonferroni method (8).

478 All reported p-values are two-tailed.  $p < 0.05$  was considered significant.

479



480 Data accessibility statement: Raw data associated with each figure are available for download from Open  
481 Science Forum under the Project Name “Conditioned Place Preference reveals tonic pain in octopus”.

482

483 Acknowledgements

484 This study was supported by a CSUPERB New Investigator grant to RJC. Lisa Abbo, DVM provided  
485 feedback on the design and conception of the study, and Edgar Walters provided feedback on an initial  
486 draft of the manuscript.

487 Supplemental Figure:

488 S1. Route maps of representative animals from each treatment group in CPA/CPP assays, generated by  
489 Ethovision 13.0 tracking software (Noldus Inc). Routes (red lines) are shown overlaid on a reference  
490 image of the chamber for each trial. Start position in the middle chamber is shown by a filled, white circle.  
491 Final position is shown with a filled, black circle. The chamber where the octopus spent more time  
492 is shaded in green. Octopuses were tracked via center point marker, which was subject to considerable  
493 position “jitter” caused by the shift in the computed midpoint as the outline of the animal changed from  
494 extended and curled body postures (most notable here in the Control Initial and Lidocaine Final routes).  
495 Because this typically occurred along chamber edges it did not affect automatic detection of chamber  
496 occupancy.  
497

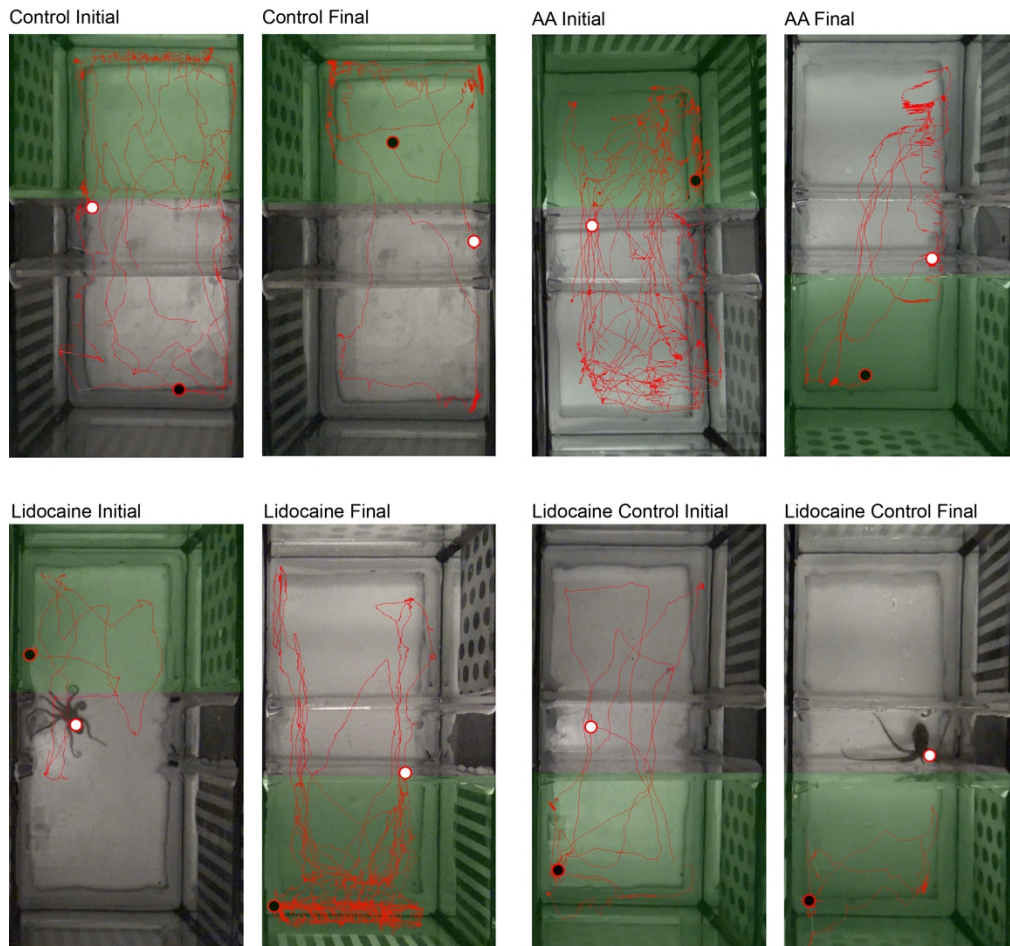

498 References for Supplemental Material:

499

- 500 1. H. M. Butler-Struben, S. M. Brophy, N. A. Johnson, R. J. Crook, In vivo recording of neural and  
501 behavioral correlates of anesthesia induction, reversal, and euthanasia in cephalopod molluscs.  
502 *Front. Physiol.* **9** (2018), doi:10.3389/fphys.2018.00109.
- 503 2. G. Fiorito, A. Affuso, J. Basil, A. Cole, P. de Girolamo, L. D'Angelo, L. Dickel, C. Gestal, F.  
504 Grasso, M. Kuba, F. Mark, D. Melillo, D. Osorio, K. Perkins, G. Ponte, N. Shashar, D. Smith, J.  
505 Smith, P. L. Andrews, Guidelines for the Care and Welfare of Cephalopods in Research –A  
506 consensus based on an initiative by CephRes, FELASA and the Boyd Group. *Lab. Anim.* **49**, 1–90  
507 (2015).
- 508 3. N. Percie du Sert, V. Hurst, A. Ahluwalia, S. Alam, M. T. Avey, M. Baker, W. J. Browne, A. Clark, I.  
509 C. Cuthill, U. Dirnagl, M. Emerson, P. Garner, S. T. Holgate, D. W. Howells, N. A. Karp, S. E.  
510 Lazic, K. Lidster, C. J. MacCallum, M. Macleod, E. J. Pearl, O. H. Petersen, F. Rawle, P.  
511 Reynolds, K. Rooney, E. S. Sena, S. D. Silberberg, T. Steckler, H. Würbel, The ARRIVE  
512 guidelines 2.0: Updated guidelines for reporting animal research. *PLoS Biol.* **18**, e3000410 (2020).
- 513 4. Y. Gutfreund, H. Matzner, T. Flash, B. Hochner, Patterns of motor activity in the isolated nerve  
514 cord of the octopus arm. *Biol. Bull.* **211**, 212–22 (2006).
- 515 5. C. H. F. Rowell, Activity of interneurons in the arm of Octopus in response to tactile stimulation.  
516 *J. Exp. Biol.* **44**, 589–605 (1966).
- 517 6. J. S. Alupay, S. P. Hadjisolomou, R. J. Crook, Arm injury produces long-term behavioral and  
518 neural hypersensitivity in octopus. *Neurosci. Lett.* **558**, 137–142 (2014).
- 519 7. K. E. Fouke, H. J. Rhodes, Electrophysiological and motor responses to chemosensory stimuli in  
520 isolated cephalopod arms. *Biol. Bull.* **238**, 1–11 (2020).
- 521 8. S. Holm, A Simple Sequentially Rejective Multiple Test Procedure. *Scand. J. Stat.* **6**, 65–70  
522 (1979).
- 523
